# Supplementary material
Source: PubMed Central journal article supplement (PMC9813640)
Supplement: mmc1.pdf [file mmc1.pdf]

## **Methods**

### *Eligibility*

Histopathologic data from autopsy, surgical and biopsy studies were collected based on 2009 Preferred Reporting Items for Systematic Reviews and Meta-Analyses (PRISMA) guidelines [25, 26]. Non-peer reviewed studies, duplicate articles, autopsy guideline consensus/review articles, studies, or cases with only macroscopic description or without confirmation of SARS-CoV-2 infection by real-time reverse-transcriptase polymerase chain reaction (RT-PCR) were excluded. Full texts article in English language and studies or cases with available microscopic description were included. The review focuses on histopathology. Laboratory, imaging and macroscopic findings were not included in this manuscript.

### *Search Strategy*

PubMed and Medline (EBSCO and Ovid) were queried from June 4 to September 30, 2020, using the following key search terms: “(COVID-19 OR SARS-CoV-2)” AND (Pathology OR Pathological OR Postmortem OR Autopsy OR Biopsy).” The references of each included article were screened to identify additional potential studies.

### *Study Selection*

Articles or the English abstract in Chinese language articles were independently screened by three authors (SC, MK, and GAG) to decide whether these met inclusion criteria (Supplementary Figure 1). The authors who screened and included manuscripts were not blinded to the manuscript’s authors.

### *Evaluation of Manuscript Quality*

Quality analysis was performed based on previously reported pathology review criteria, including case series and case reports [27]. Articles were evaluated based on the availability of clinical, microscopic, and macroscopic data for each patient included in the article. Based on these criteria, articles were deemed high quality if all three data categories were available; moderate quality if macroscopic data were not available; and low quality if clinical or microscopic data were not available.

#### *Data Collection*

Data were extracted independently by each author based on a common framework. Specifically, this included the following information: number of total cases, patient's age, gender, ethnicity, comorbidities, procedure performed (e.g., autopsy with type and methodology, biopsy, surgical resection), organs analyzed, histopathologic features characteristic of each specific organ analyzed, ancillary studies.

In some studies, pathologic findings were described only as present or absent, and the number of patients demonstrating these findings was not reported. In this case, the reference was cited, but the number of patients was not included in the total count. Although a full autopsy was performed in some studies, the description was limited to a single organ system.

Supplementary Figure 1. Flow-chart of systematic literature review methodology.

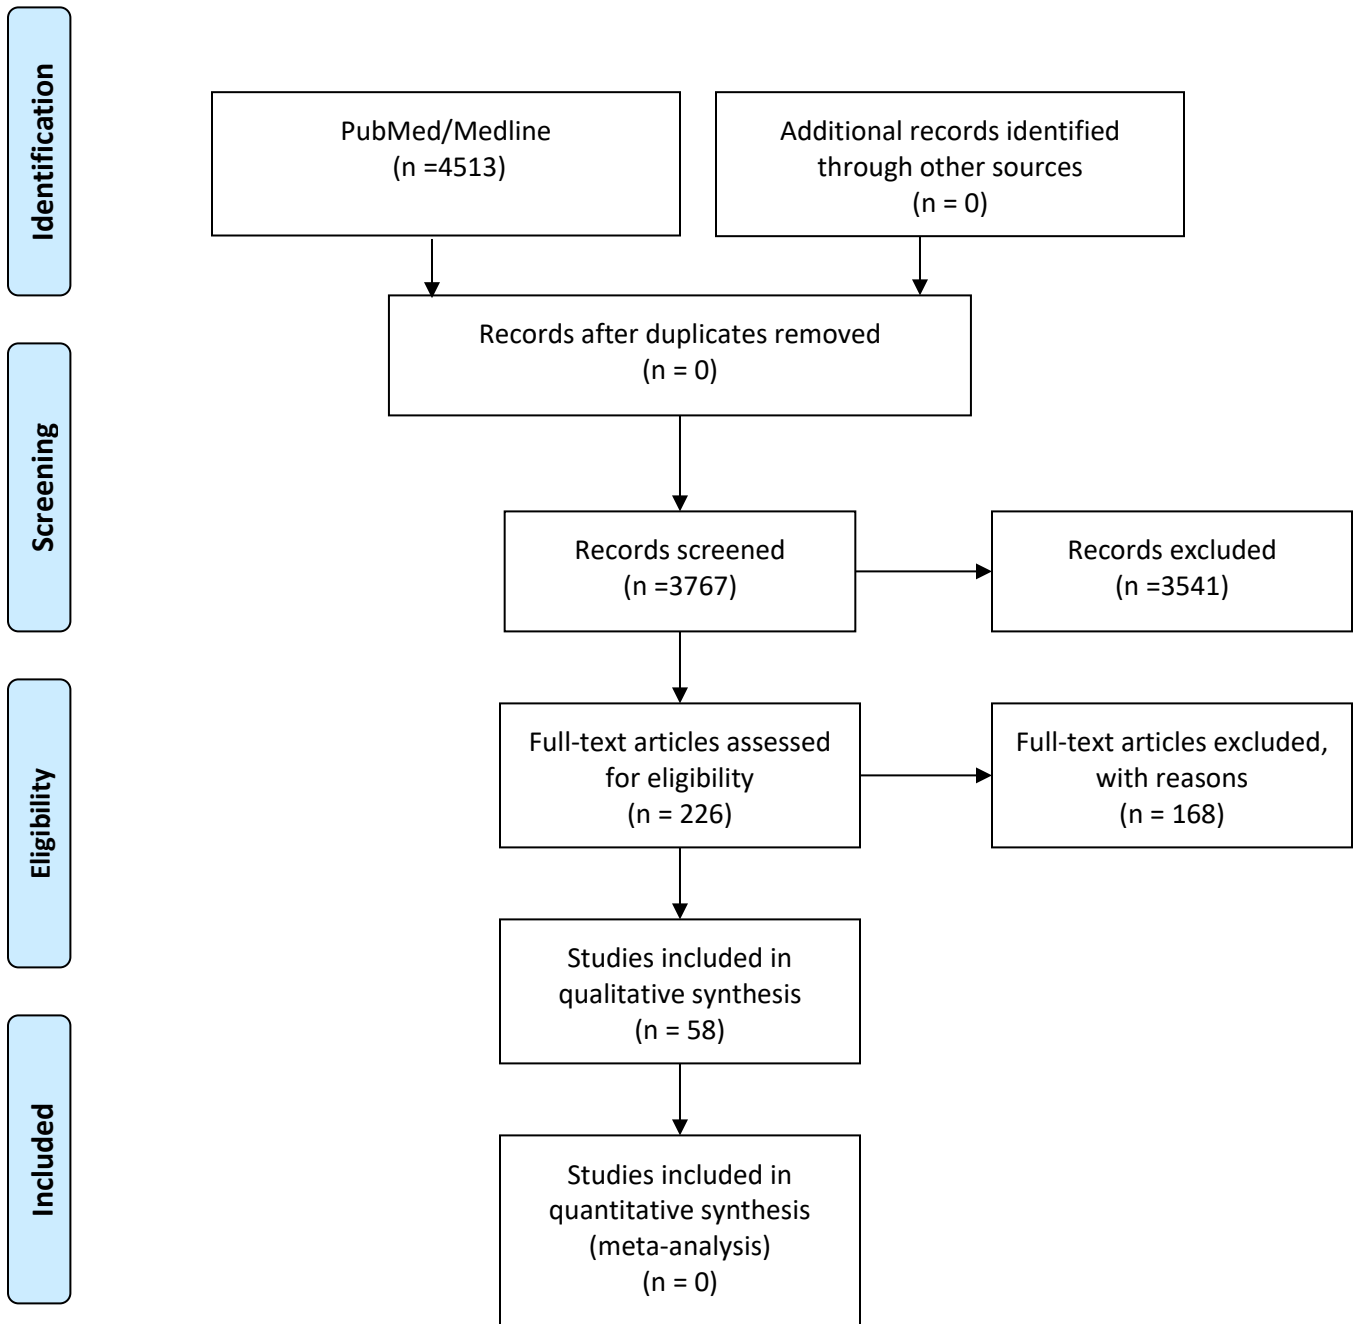

Supplementary Table 1: Quality assessment of the included reports.

| Article              | Procedure type | N. patients | Clinical data<br>(per case) | Microscopic<br>data (per case) | Macroscopic<br>data (per case) | Quality  |
|----------------------|----------------|-------------|-----------------------------|--------------------------------|--------------------------------|----------|
| Ackerman M et al.    | Autopsy        | 7           | No                          | No                             | No                             | Low      |
| Adachi T et al.      | Autopsy        | 1           | Yes                         | Yes                            | Yes                            | High     |
| Aguiar D et al.      | Autopsy        | 1           | Yes                         | Yes                            | Yes                            | High     |
| Barton LM et al.     | Autopsy        | 2           | Yes                         | Yes                            | Yes                            | High     |
| Basso C et al.       | Autopsy        | 21          | No                          | No                             | No                             | Low      |
| Bosmuller H et al.   | Autopsy        | 4           | Yes                         | Yes                            | Yes                            | High     |
| Bradley BT et al.    | Autopsy        | 14          | Yes                         | Yes                            | No                             | Moderate |
| Borczuk A et al.     | Autopsy        | 68          | No                          | No                             | No                             | Low      |
| Buja LM et al.       | Autopsy        | 3           | Yes                         | Yes                            | Yes                            | High     |
| Carsana L et al.     | Autopsy        | 38          | No                          | No                             | No                             | Low      |
| Craver R et al.      | Autopsy        | 1           | Yes                         | Yes                            | Yes                            | High     |
| Dohnnikoff, M et al. | Autopsy        | 1           | Yes                         | Yes                            | No                             | Moderate |
| Edler C et al.##     | Autopsy        | 80          | Yes                         | No                             | No                             | Low      |
| Escher F et al.      | Biopsy         | 5           | Yes                         | No                             | No                             | Low      |
| Fitzek A et al.      | Autopsy        | 1           | Yes                         | Yes                            | Yes                            | High     |
| Fox S et al.         | Autopsy        | 10          | Yes                         | No                             | No                             | Low      |
| Fox S et al.**       | Autopsy        | 22          | No                          | No                             | No                             | Low      |
| Grimes Z. et al.     | Autopsy        | 2           | Yes                         | No                             | Yes                            | Low      |
| Kantonen J et al.    | Autopsy        | 4           | Yes                         | Yes                            | No                             | Moderate |
| Kissling S et al.    | Biopsy         | 1           | Yes                         | Yes                            | No                             | Moderate |
| Kudose S et al.#     | Biopsy         | 17          | Yes                         | Yes                            | No                             | Moderate |
| Larsen CP et al.     | Biopsy         | 1           | Yes                         | Yes                            | No                             | Moderate |
| Lax SF et al.        | Autopsy        | 11          | Yes                         | Yes                            | Yes                            | High     |
| Lindner D et al.*    | Autopsy        | 39          | No                          | No                             | No                             | Low      |
| Magoon S et al.      | Biopsy         | 2           | Yes                         | Yes                            | No                             | Moderate |
| Matschke, J et al.   | Autopsy        | 43          | Yes                         | Yes                            | Yes                            | High     |
| Menter T et al.      | Autopsy        | 21          | Yes                         | Yes                            | Yes                            | High     |
| Nunes Duarte-Neto A  | Autopsy        | 10          | Yes                         | Yes                            | No                             | Moderate |
| Peleg Y et al.       | Biopsy         | 1           | Yes                         | Yes                            | No                             | Moderate |

|                                    |                            |    |     |     |     |          |
|------------------------------------|----------------------------|----|-----|-----|-----|----------|
| Pernazza A et al.                  | Surgical resection         | 1  | Yes | Yes | No  | Moderate |
| Rapkiewicz AV et al.               | Autopsy                    | 7  | Yes | No  | No  | Low      |
| Ross Reichard, T et al.            | Autopsy                    | 1  | Yes | Yes | Yes | High     |
| Rossi GM et al.                    | Biopsy                     | 1  | Yes | Yes | No  | Moderate |
| Santoriello D et al.               | Biopsy                     | 42 | No  | No  | No  | Low      |
| Sauter J et al.                    | Autopsy                    | 8  | Yes | Yes | No  | Moderate |
| Schaefer IM et al.                 | Autopsy                    | 7  | Yes | Yes | No  | Moderate |
| Schaller T et al.                  | Autopsy                    | 10 | Yes | Yes | No  | Moderate |
| Sekulic M et al.                   | Autopsy                    | 2  | Yes | Yes | Yes | High     |
| Sharma P. et al (J Am Soc Nephrol) | Biopsy                     | 10 | Yes | Yes | No  | Moderate |
| Sharma Y. et al (Kidney Medl)      | Biopsy                     | 2  | Yes | Yes | No  | Moderate |
| Solomon, I et al.                  | Autopsy                    | 18 | Yes | Yes | Yes | High     |
| Su H. et al.                       | Autopsy                    | 26 | Yes | Yes | No  | Moderate |
| Suess C et al.                     | Autopsy                    | 1  | Yes | Yes | Yes | High     |
| Tavazzi G. et al.                  | Biopsy                     | 1  | Yes | Yes | No  | Moderate |
| The COVID-19 Autopsy               | Autopsy                    | 1  | Yes | Yes | Yes | High     |
| Tian S et al. (J Thor Oncol)       | Surgical resection         | 2  | Yes | Yes | No  | Moderate |
| Tian S et al. (Mod Pathol)         | Postmortem biopsy          | 4  | Yes | Yes | NA  | Moderate |
| Varga Z et al.                     | Autopsy/Surgical resection | 3  | Yes | Yes | No  | Moderate |
| Wang Y et al.                      | Postmortem biopsy          | 2  | Yes | Yes | No  | Moderate |
| Wenz, P et al.                     | Biopsy                     | 2  | Yes | No  | No  | Low      |
| Wichmann D et al.                  | Autopsy                    | 12 | Yes | Yes | Yes | High     |
| Von Weyhern CH et al.              | Autopsy                    | 6  | Yes | Yes | No  | Moderate |
| Xu X et al.                        | Postmortem biopsy          | 10 | No  | No  | No  | Low      |

|                |                      |   |     |     |     |          |
|----------------|----------------------|---|-----|-----|-----|----------|
| Xu Z et al.    | Postmortem<br>biopsy | 1 | Yes | Yes | No  | Moderate |
| Yan L et al.   | Autopsy              | 1 | Yes | Yes | Yes | High     |
| Yao XH et al.  | Autopsy              | 3 | Yes | No  | No  | Low      |
| Youd A et al.  | Autopsy              | 3 | Yes | Yes | Yes | High     |
| Zhang H et al. | Postmortem<br>biopsy | 1 | Yes | Yes | No  | Moderate |

\* Cohort included in Edler et al.

\*\* 22 patients including 10 from Fox SE et al. Pulmonary and cardiac pathology in African American patients with COVID-19: an autopsy series from New Orleans. *Lancet Respir Med* 2020; 8: 681–86.

# 1 patient also reported in Peleg et al. Acute Kidney Injury Due to Collapsing Glomerulopathy Following COVID-19 Infection. *Kidney Int Rep.* 2020;5:940-45.

##Cases 2-13 also included in Wichmann et al. Autopsy Findings and Venous Thromboembolism in Patients With COVID-19: A Prospective Cohort Study. *Ann Intern Med.* 2020;173:268-77.

Supplementary Table 2. Putative virus or virus-like particles reported by transmission electron microscopy in recent literature.

| <b>Organ</b> | <b>Cell/Site of Identification</b> | <b>Reclassification</b>     | <b>Reference</b>                                      |
|--------------|------------------------------------|-----------------------------|-------------------------------------------------------|
| Bowel        | Enterocyte                         | Unidentified – not virions  | Bradley BT et al. Lancet, 2020                        |
| Heart        | Endothelium                        | Unidentified – not virions  | Fox SE et al. Circulation, 2020                       |
|              | Interstitial cell                  | Clathrin-coated vesicles    | Tavazzi G et al. Eur J Heart Fail, 2020               |
|              | Endothelial cell                   | Rough endoplasmic reticulum | Dolhnikoff M et al. Lancet Child Adolesc Health, 2020 |
|              | Fibroblast                         | Rough endoplasmic reticulum | Dolhnikoff M et al. Lancet Child Adolesc Health, 2020 |
| Kidney       | Myocardocyte                       | Unidentified – not virions  | Dolhnikoff M et al. Lancet Child Adolesc Health, 2020 |
|              | Neutrophils                        | Unidentified – not virions  | Dolhnikoff M et al. Lancet Child Adolesc Health, 2020 |
|              | Tubular epithelial cell            | Clathrin-coated vesicles    | Su H et al. Kidney Int, 2020                          |
|              | Tubular epithelial cell            | Clathrin-coated vesicles    | Farkash EA, et al. JASN, 2020                         |
|              | Endothelial cells                  | Clathrin-coated vesicles    | Bradley BT et al. Lancet, 2020                        |
|              | Podocytes                          | Clathrin-coated vesicles    | Su H et al. Kidney Int, 2020                          |
|              | Glomerular endothelium             | Multivesicular bodies       | Menter T et al. Histopathology, 2020                  |
|              | Podocyte                           | Multivesicular bodies       | Menter T et al. Histopathology, 2020                  |
|              | Podocyte                           | Multivesicular bodies       | Kissling S et al. Kidney Int., 2020                   |
|              | Tubular epithelial cells           | Multivesicular bodies       | Farkash EA, et al. JASN, 2020                         |
|              | Glomerular endothelium             | Multivesicular bodies       | Buja ML et a;. Cardiovasc Pathol, 2020                |
|              | Glomerular endothelium             | Rough endoplasmic reticulum | Varga Z et al. Lancet, 2020                           |
| Lung         | Tubular epithelial cell            | Clathrin-coated vesicles    | Fox SE et al. Circulation, 2020                       |
|              | Glomerular endothelium             | Unidentified – not virion   | Buja ML et a;. Cardiovasc Pathol, 2020                |
|              | Tubular epithelial cell            | Unidentified – not virion   | Menter T et al. Histopathology, 2020                  |
|              | Tubular epithelial cell            | Unidentified – not virions  | Bradley BT et al. Lancet, 2020                        |
|              | Pneumocyte                         | Clathrin-coated vesicles    | Grimes Z, et al. Cardiovasc Pathol, 2020              |
|              | Endothelium                        | Unidentified – not virion   | Bosmuller H et al. Virchows Archiv, 2020              |
|              | Pneumocyte                         | Clathrin-coated vesicles    | Borczuk et al.                                        |
|              | Pneumocyte                         | Multivesicular bodies       | Bradley BT et al. Lancet, 2020                        |
|              | Pneumocyte                         | Multivesicular bodies       | Grimes Z, et al. Cardiovasc Pathol, 2020              |

|         |                   |                             |                                          |
|---------|-------------------|-----------------------------|------------------------------------------|
|         | Endothelium       | Rough endoplasmic reticulum | Borckzuk et al.                          |
|         | Endothelium       | Unidentified – not virions  | Ackermann M, N Engl J Med, 2020          |
|         | Pneumocyte type 1 | Unidentified – not virion   | Bosmuller H et al. Virchows Archiv, 2020 |
|         | Pneumocyte        | Unidentified – not virion   | Bradley BT et al. Lancet, 2020           |
|         | Pneumocyte        | Unidentified – not virion   | Fox SE et al. Circulation, 2020          |
|         | Unspecified       | Unidentified – not virion   | Fox SE et al. Lancet Resp Med, 2020      |
| Trachea | Epithelial cell   | Unidentified – not virions  | Bradley BT et al. Lancet, 2020           |
|         | Epithelial cell   | Clathrin-coated vesicles    | Bradley BT et al. Lancet, 2020           |

---
